# Supplementary material for: Acidic ionic liquid supported on silica-coated magnetite nanoparticles as a green catalyst for one-pot diazotization–halogenation of the aromatic amines
Source: Royal Society of Chemistry journal article supplement (doi:10.1039/c4ra05705h), 2014-01-01
Supplement: c4ra05705h1.pdf [file c4ra05705h1.pdf]

Supporting informations for:

**Acidic ionic liquid supported on silica-coated magnetite nanoparticle as  
green catalyst for one - pot diazotization – halogenation of the aromatic  
amines**

Jalal Isaad\*[<sup>a</sup>]

*[<sup>a</sup>] University Lille Nord de France, Engineering and Textile Materials*

*Laboratory, F-5900 Lille, France*

*Fax: +33 0320272597*

*E-mail: [jalal.isaad@ensait.fr](mailto:jalal.isaad@ensait.fr)*

**Summary**

**Table 5:** <sup>13</sup>C NMR spectroscopic data (δ, ppm) for the glycide portions for deprotected 3-*O*-D-glucoyl derivatives **S2**

**Table 6:** <sup>13</sup>C NMR spectroscopic data (δ, ppm) of the glycide portion for deprotected lactose derivatives **S2**

**Table 5.** <sup>13</sup>C NMR spectroscopic data (δ, ppm) for the glycide portions for deprotected 3-*O*-D-glucoyl derivatives

| substrate    | solvent            | C-1  | C-2  | C-3  | C-4  | C-5  | C-6  |
|--------------|--------------------|------|------|------|------|------|------|
| <b>7a-αp</b> | Me <sub>2</sub> SO | 92.4 | 72.2 | 81.9 | 72.1 | 70.1 | 61.2 |
| <b>9a-αp</b> | Me <sub>2</sub> SO | 92.3 | 72.1 | 82.0 | 72.2 | 70.1 | 61.3 |
| <b>9c-αp</b> | Me <sub>2</sub> SO | 92.2 | 72.2 | 82.0 | 72.0 | 70.1 | 61.0 |
| <b>7a-βp</b> | Me <sub>2</sub> SO | 96.9 | 76.7 | 85.2 | 74.6 | 69.8 | 61.1 |
| <b>9a-βp</b> | Me <sub>2</sub> SO | 97.0 | 76.7 | 85.3 | 74.7 | 69.8 | 61.1 |
| <b>9c-βp</b> | Me <sub>2</sub> SO | 96.8 | 76.7 | 85.3 | 74.7 | 69.8 | 61.0 |

**Table 6:** <sup>13</sup>C NMR spectroscopic data (δ, ppm) of the glycide portion for deprotected lactose derivatives.

| Compound          | Solvent            | C-1'  | C-2' | C-3' | C-4'  | C-5' | C-6'  | C-1  | C-2   | C-3  | C-4  | C-5  | C-6  |
|-------------------|--------------------|-------|------|------|-------|------|-------|------|-------|------|------|------|------|
| <b>α-lactose*</b> | D <sub>2</sub> O   | 103.7 | 72.0 | 73.5 | 69.54 | 76.2 | 62.0  | 96.6 | 74.83 | 75.3 | 79.2 | 75.6 | 61.1 |
| <b>7b-α</b>       | Me <sub>2</sub> SO | 102.3 | 72.6 | 73.3 | 68.4  | 74.7 | 67.5  | 95.1 | 74.2  | 75.1 | 80.0 | 75.3 | 60.8 |
| <b>9b-α</b>       | Me <sub>2</sub> SO | 102.8 | 72.7 | 73.6 | 68.4  | 74.8 | 67.5  | 95.5 | 74.4  | 75.0 | 80.1 | 75.2 | 60.6 |
| <b>9d-α</b>       | Me <sub>2</sub> SO | 102.2 | 72.7 | 73.6 | 68.4  | 74.8 | 67.4  | 95.8 | 74.5  | 75.1 | 80.4 | 75.5 | 60.6 |
| <b>β-lactose*</b> | D <sub>2</sub> O   | 103.6 | 72.0 | 73.5 | 69.5  | 76.2 | 62.0  | 92.7 | 72.2  | 72.4 | 79.3 | 71.0 | 61.1 |
| <b>7b-β</b>       | Me <sub>2</sub> SO | 102.3 | 72.4 | 73.4 | 68.2  | 74.2 | 67.51 | 95.0 | 72.7  | 72.1 | 81.2 | 71.3 | 60.7 |
| <b>9b-β</b>       | Me <sub>2</sub> SO | 102.6 | 72.5 | 73.8 | 68.3  | 74.6 | 67.5  | 95.7 | 72.3  | 72.2 | 80.7 | 71.8 | 60.5 |
| <b>9d-β</b>       | Me <sub>2</sub> SO | 102.8 | 72.4 | 73.8 | 68.3  | 74.6 | 67.2  | 95.6 | 72.5  | 72.2 | 80.7 | 71.8 | 60.5 |
